# Supplementary material
Source: PubMed Central journal article supplement (PMC4363427)
Supplement: IAI.02916-14_zii999091156so1.pdf [file IAI.02916-14_zii999091156so1.pdf]

1 **Table S1.** Oligonucleotides used in this study

| Name          | Sequence ( 5' - 3')                               | target                                                         | Reference         |
|---------------|---------------------------------------------------|----------------------------------------------------------------|-------------------|
| S2Aup         | ATGAAGTGTATATTATTTA                               | <i>stx</i> <sub>2A</sub> fragment                              | (1)               |
| S2Alp         | TTCTTCATGCTTAACTCCT                               |                                                                |                   |
| UP 378        | GCGTTTTGACCATCTTCGT                               | 378 bp fragment <i>stx</i> <sub>2-A</sub>                      | (2)               |
| LP 378        | ACAGGAGCAGTTTCAGACAG                              |                                                                |                   |
| Stx2Bup       | ATGAAGAAGATGTTTATG                                | <i>stx</i> <sub>2B</sub> fragment                              | This study        |
| Stx2Blp       | TCAGTCATTATTA <sup>AA</sup> CTG                   |                                                                |                   |
| Tc-5          | TCAGCCCCATACGATATAA                               | gene <i>tet</i>                                                | (3)               |
| Tc-3          | TGGAGTGGTGAATCCGTTA                               |                                                                |                   |
| Tc-int        | TGTCGGAATGGACGATAT                                | binding 5' of <i>tet</i> cassette                              | (3)               |
| Cm-3          | CATATGAATATCCTCCTTA                               | gene <i>cat</i>                                                | (3)               |
| Cm-5          | TGTGTAGGCTGGAGCTGCTTC                             |                                                                |                   |
| pGEM7up       | TGTAATACGACTCACTAT                                | confirmation of pGEM construct                                 | Promega           |
| BaeSup        | ATGAAGTTCTGGCGACCCGGTA                            | <i>baeS</i>                                                    | Modified from (4) |
| BaeSint       | CGTGCCATCGACAAGTCGTT                              | <i>baeS</i>                                                    | This study        |
| BaeRlp        | CTAAACGATGCGGCAGGCGT                              | <i>baeR</i>                                                    | Modified from (4) |
| Tc-5BaeS      | <u>TTATATCGTATGGGGCTGACTGAAA</u><br>GACAAAGCGATCA | $\Delta$ <i>baeSR</i> mutant construction.<br>Overlapping Tc-5 | Modified from (4) |
| Tc-3BaeR      | <u>TAACGGATTCACCACTCCAGCGTA</u><br>GTAACCGACCGCA  | $\Delta$ <i>baeSR</i> mutant construction<br>overlapping Tc-3  | Modified from (4) |
| STX-Any f     | ACGGACAGCAGTTATACCACTCT                           | Real-Time qPCR for <i>stx</i> <sub>2</sub>                     | (5)               |
| STX-Any r     | ACGTTCCGGAATGCAAATCAG                             |                                                                |                   |
| STX-Any probe | FAM- CCAGCGCTGCGACACG-NFQ                         |                                                                |                   |
| BamA-up       | CGTGATGGTGATACCCTTCTG                             | RT-qPCR assay for <i>bamA</i>                                  | (6)               |
| BamA-lp       | GAGAAAGTAATGCTGGCAATG                             |                                                                |                   |
| Ecoli-F       | CATGCCGCGTGTATGAAGAA                              | RT-qPCR assay for 16SrDNA of                                   | (7)               |
| Ecoli-R       | CGGGTAACGTCATAGAGCAAA                             | <i>E. coli</i>                                                 |                   |

2

3

4

5

6 **Supplemental references**

- 7 1. **Muniesa M, de Simon M, Prats G, Ferrer D, Pañella H, Jofre J.** 2003. Shiga  
8 toxin 2-converting bacteriophages associated with clonal variability in  
9 *Escherichia coli* O157:H7 strains of human origin isolated from a single  
10 outbreak. *Infect. Immun.* **71**:4554–62.
- 11 2. **Muniesa M, Jofre J.** 1998. Abundance in sewage of bacteriophages that infect  
12 *Escherichia coli* O157:H7 and that carry the Shiga toxin 2 gene. *Appl. Environ.*  
13 *Microbiol.* **64**:2443–2448.
- 14 3. **Serra-Moreno R, Acosta S, Hernalsteens JP, Jofre J, Muniesa M.** 2006. Use  
15 of the lambda Red recombinase system to produce recombinant prophages  
16 carrying antibiotic resistance genes. *BMC Mol. Biol.* **7**:31.
- 17 4. **Imamovic L, Muniesa M.** 2012. Characterizing RecA-independent induction of  
18 Shiga toxin2-encoding phages by EDTA treatment. *PLoS One* **7**.
- 19 5. **Imamovic L, Serra-Moreno R, Jofre J, Muniesa M.** 2010. Quantification of  
20 Shiga toxin 2-encoding bacteriophages, by real-time PCR and correlation with  
21 phage infectivity. *J. Appl. Microbiol.* **108**:1105–14.
- 22 6. **Bennion D, Charlson ES, Coon E, Misra R.** 2010. Dissection of  $\beta$ -barrel outer  
23 membrane protein assembly pathways through characterizing BamA POTRA 1  
24 mutants of *Escherichia coli*. *Mol. Microbiol.* **77**:1153–71.
- 25 7. **Huijsdens XW, Linskens RK, Mak M, Meuwissen SGM, Vandenbroucke-**  
26 **Grauls CMJE, Savelkoul PHM.** 2002. Quantification of bacteria adherent to  
27 gastrointestinal mucosa by real-time PCR. *J. Clin. Microbiol.* **40**:4423–7.

28

29
